# Supplementary material
Source: MDPI journal article supplement (https://www.mdpi.com/2071-1050/16/10/4274)

## Supplementary

Table S1 Region division of China

Figure S1 Illustration of meta-frontier technology and group-frontier technologies

**Table S1** Region division of China

| Regions          | Provinces                                                                                                |
|------------------|----------------------------------------------------------------------------------------------------------|
| Eastern region   | Beijing, Tianjin, Hebei, Shanghai, Jiangsu, Zhejiang, Fujian, Shandong, Hainan, Guangdong                |
| Central region   | Henan, Anhui, Jiangxi, Hubei, Hunan, Shanxi                                                              |
| Western region   | Sichuan, Chongqing, Guizhou, Yunnan, Shaanxi, Gansu, Qinghai, Ningxia, Xinjiang, Guangxi, Inner Mongolia |
| Northeast region | Liaoning, Jilin, Heilongjiang                                                                            |

**Figure S1** Illustration of meta-frontier technology and group-frontier technologies.

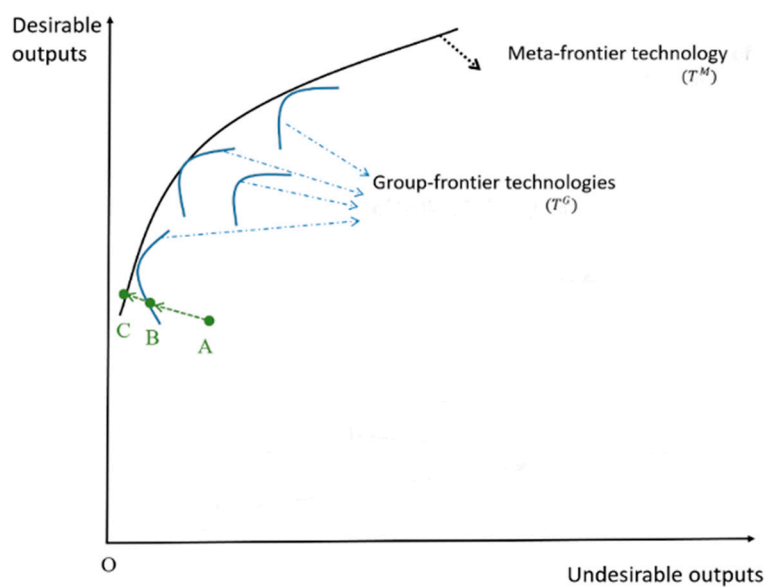

Supplement: s1 [file s1]
